# Supplementary material for: Survival by Heart Failure Phenotype in a Fontan Surveillance Population, 2010-2023
Source: Research Square preprint supplement (doi:10.21203/rs.3.rs-8022379/v1), 2025-11-14
Supplement: Supplementary file 1 [file 0ecc02316a981bd9341fada1.docx]

**Supplemental Table 1:** Codes to define Fontan complications and heart transplant

| **Category** | **Code Type** | **Code** | **Description** |
| --- | --- | --- | --- |
| **Fontan Complications** | | | |
| **Dysrhythmia** | ICD-9-CM | 427.0 | parox atrial tachycardia |
| ICD-9-CM | 427.1 | parox ventric tachycard |
| ICD-9-CM | 427.2 | parox tachycardia nos |
| ICD-9-CM | 427.31 | atrial fibrillation |
| ICD-9-CM | 427.32 | atrial flutter |
| ICD-9-CM | 427.81 | sinoatrial node dysfunct |
| ICD-9-CM | V45.0 | cardiac pacemaker status (end 1994) |
| ICD-9-CM | V53.3 | adjust cardiac pacemaker (end 1994) |
| ICD-9-CM | V53.31 | adjust cardiac pacemaker (begin 1994) |
| ICD-10-CM | I49.0 | ventricular fibrillation and flutter |
| ICD-10-CM | I49.01 | ventricular fibrillation |
| ICD-10-CM | I49.02 | ventricular flutter |
| ICD-10-CM | I49.5 | sick sinus syndrome |
| ICD-9-CM | 427.89 | cardiac dysrhythmias nec |
| ICD-9-CM | 427.9 | cardiac dysrhythmia nos |
| ICD-10-CM | I49.8 | other specified cardiac arrhythmias |
| ICD-10-CM | I49.9 | cardiac arrhythmia, unspecified |
| **Cyanosis** | ICD-9-CM | 782.5 | cyanosis |
| ICD-10-CM | R23.0 | cyanosis |
| **Heart Failure** | ICD-9-CM | 428.1 | Left heart failure |
| ICD-9-CM | 402.01 | Malignant hypertensive heart disease with heart failure |
| ICD-9-CM | 402.11 | Benign hypertensive heart disease with heart failure |
| ICD-9-CM | 402.91 | Unspecified hypertensive heart disease with heart failure |
| ICD-9-CM | 428.31 | Acute diastolic heart failure |
| ICD-9-CM | 428.32 | Chronic diastolic heart failure |
| ICD-9-CM | 428.33 | Acute on chronic diastolic heart failure |
| ICD-9-CM | 428.3 | Diastolic heart failure, unspecified |
| ICD-9-CM | 428.0 | Congestive heart failure, unspecified |
| ICD-9-CM | 428.9 | Heart failure, unspecified |
| ICD-9-CM | 428.2 | Systolic heart failure, unspecified |
| ICD-9-CM | 428.21 | Acute systolic heart failure |
| ICD-9-CM | 428.22 | Chronic systolic heart failure |
| ICD-9-CM | 428.23 | Acute chronic systolic heart failure |
| ICD-9-CM | 428.4 | Combined systolic and diastolic heart failure, unspecified |
| ICD-9-CM | 428.41 | Acute combined systolic and diastolic heart failure |
| ICD-9-CM | 428.42 | Chronic combined systolic and diastolic heart failure |
| ICD-9-CM | 428.43 | Acute on chronic combined systolic and diastolic heart failure |
| ICD-10-CM | I50.1 | Left ventricular failure, unspecified |
| ICD-10-CM | I50.814 | Right heart failure due to left heart failure |
| ICD-10-CM | I50.82 | Biventricular heart failure |
| ICD-10-CM | I50.84 | End stage heart failure |
| ICD-10-CM | I11.0 | Hypertensive heart disease with heart failure |
| ICD-10-CM | I13.0 | Hypertensive heart and chronic kidney disease with heart failure and stage 1 through stage 4 chronic kidney disease, or unspecified chronic kidney disease |
| ICD-10-CM | I13.2 | Hypertensive heart and chronic kidney disease with heart failure and with stage 5 chronic kidney disease, or end stage renal disease |
| ICD-10-CM | I50.31 | Acute diastolic (congestive) heart failure |
| ICD-10-CM | I50.32 | Chronic diastolic (congestive) heart failure |
| ICD-10-CM | I50.33 | Acute chronic diastolic (congestive) heart failure |
| ICD-10-CM | I50.30 | Unspecified diastolic (congestive) heart failure |
| ICD-10-CM | I50.810 | Right heart failure, unspecified |
| ICD-10-CM | I50.811 | Acute right heart failure |
| ICD-10-CM | I50.812 | Chronic right heart failure |
| ICD-10-CM | I50.813 | Acute chronic heart failure |
| ICD-10-CM | I50.83 | High output heart failure |
| ICD-10-CM | I50.89 | Other heart failure |
| ICD-10-CM | I50.9 | Heart failure, unspecified |
| ICD-10-CM | I50.2 | Systolic heart failure |
| ICD-10-CM | I50.21 | Acute systolic (congestive) heart failure |
| ICD-10-CM | I50.22 | Chronic systolic (congestive) heart failure |
| ICD-10-CM | I50.23 | Acute chronic systolic (congestive) heart failure |
| ICD-10-CM | I50.41 | Acute combined systolic (congestive) and diastolic (congestive) heart failure |
| ICD-10-CM | I50.42 | Chronic combined systolic (congestive) and diastolic (congestive) heart failure |
| ICD-10-CM | I50.43 | Acute on chronic combined systolic (congestive) and diastolic (congestive) heart failure |
| ICD-10-CM | I50.20 | Unspecified systolic (congestive) heart failure |
| ICD-10-CM | I50.40 | Unspecified combined systolic (congestive) and diastolic (congestive) heart failure |
| **Outcomes** | | | |
| **Heart Transplant** | ICD-9-CM | 37.51 | heart transplantation |
| ICD-9-CM | V42.1 | heart replaced by transplant |
| ICD-10-PCS | 02YA0Z0 | transplantation of heart, allogeneic, open approach |
| ICD-10-CM | Z94.1 | heart transplant status |
| CPT | 33945 | heart transplant |
