# Supplementary material for: Survival by Heart Failure Phenotype in a Fontan Surveillance Population, 2010-2023
Source: Research Square preprint supplement (doi:10.21203/rs.3.rs-8022379/v1), 2025-11-14
Supplement: Supplementary file 2 [file fd15872ee1dceba147cd480d.docx]

**Highlights**

- Development of heart failure post-Fontan is time dependent
- 5-year survival for systolic heart failure (overall 91.8%) is lessened by cyanosis
- 5-year survival for Fontan patients without systolic heart failure is 97.3%
- 5-year transplant survival for failed Fontan is 74.4%, similar to other indications
